# Supplementary material for: Applying the Model of Expert ATC Decision-Making to Analyze a Loss of Separation Incident
Source: Research Square preprint supplement (doi:10.21203/rs.3.rs-6965001/v1), 2025-07-26
Supplement: Supplementary file 1 [file 5bf6e524071a1e6d4d2802b8.docx]

**Manuscript Title:** Applying the Model of Expert ATC Decision-Making to Analyze a Loss of Separation Incident

**Journal:** Cognition, Technology & Work

**Authors, affiliations and ORCID: Gyles, D*1,** https//orcid.org/0000-0001-7833-1297 **& Bearman, C.1,2** , https//orcid.org/0000-0001-9892-9878

**1Central Queensland University, Appleton Institute 2University of Central Lancashire**

***Corresponding author:** Appleton Institute, 44 Greenhill Road, Wayville, South Australia 5034. Email: dongyles@optusnet.com.au

**Appendix A – (online resource) Decision Element Interaction Mapping – Framework (DEIM-F)**

This example is populated with material derived from the case study elaborated in the paper. Occurrence specific examples are in italics. Due to confidentiality requirements, the original incident report is not available for display in this guide.

Event – event identifier (Loss of Separation (LOS) event during go-around on final (for this worked example)

**Instructions for use of the DEIM Framework**

1. Review the incident report and segment the occurrence into the four phases (T1–T4) to reflect the evolution of the situation from routine to unstable, to intervention, and finally to resolution.
2. Populate the table for each time period (T1-T4) by identifying the presence or absence of each of the model elements which are outlined in the table; cues, orientation/situation awareness, goals, plans, actions, feedforward, formative feedback, summative feedback, uncertainty/feeling of rightness and finally the regulatory mode, i.e. intuitive or deliberative.
3. Review and populate the key element interaction table. Identify if critical cross-element interactions occurred, such as cue-orientation changes or feedback–plan adaptations. Code as Y (expected interaction), N (expected interaction absent or delayed) or ? (unclear/ambiguous).
4. Interpret patterns across phases. Look for signs of regulatory breakdowns, goal conflicts, delayed recognition, or misaligned cognitive modes. Identify instances of adaptive response, regulatory response, or resilience.
5. Support findings with data. Anchor coding to direct excerpts or visual cues to validate – triangulate where possible.
6. Construct a narrative that integrates all of these elements to formulate a plausible explanation for the occurrence, emphasizing the aspects of decision-making and their interactions. In the investigation phase, this would be used to generate interview probes and prompts. This is particularly useful in elaborating cognitive processes and identifying lessons learnt and remedial actions. For the retrospective analysis of reports, this narrative serves as an alternative and hopefully complementary explanation to expand on the findings of the formal investigation report.

**Definitions**

**T1 – The pre-event phase**, characterized by initial framing, refers to the period before the emergence of any issues or deviations. This phase should reflect the initial interpretations of the scenario and outline the goals and plans that were formulated based on recognized cues.

Focus: involves framing the situation, being familiar with the task at hand, understanding the underlying assumptions, and establishing goals within routine or anticipated conditions.

Indicators: encompass the interpretation of cues, alignment of mental models, absence of urgency, feedforward reasoning, and intuitive control.

**T2 – The emerging issue**, characterized by the apparent instability or conflict, represents the moment at which the controller first recognizes that the situation is not developing as anticipated. New cues, alerts, or communications necessitate a reappraisal of the circumstances.

Focus: the detection of mismatch, orientation shift, goal re-evaluation, plan amendment, and increased monitoring.

Indicators: short-term conflict alert (STCA), traffic statements issued, safety alerts issued, surprises, tunnel vision, emotional shift, and the possible mode shift from intuitive to deliberative processing.

**T3 – Intervention (action to re-establish safety margin)**, this phase begins when corrective actions are taken in response to the identified issues. Performance is regulated in real time.

Focus: execution of amended plans, immediate feedback response, tight cognitive control, risk management.

Indicators: clearances, go-arounds, speed or direction changes, changes in verbal tone, and reassertion of spacing and orderliness.

**T4 – Outcome and resolution**, this phase follows resolution and includes either a return to normal operations or post-occurrence review.

Focus: feedback recognition (summative), emotional reflection, learning and potential procedural or cognitive adaptations.

Indicators: return to stability, controller commentary (if recorded), incident reporting, supervision input or lessons learned.

**DEIM-F (DEIM Framework) – LOS event on Final B789 follows A320**

|  | **T1 – Pre-Event (initial framing)** | **T2 – Emerging Issue (instability or recognition of safety margin at risk)** | **T3 – Action taken (action to restore or re-establish safety margin)** | **T4 – Outcome and resolution** |
| --- | --- | --- | --- | --- |
| Cue | *Flow Sequence, Handover, Automatic terminal information service (operational conditions recording).* | *Less than 4 nautical mile (nm) spacing and closing* | *3nm spacing and closing* | *B789 accelerates and climbs – vertical separation established* |
| Orientation/Situation Awareness | *Standard situations – moderate to high workload. Instrument Meteorological Conditions (IMC) – although not clear that this is recognized.* | *Safety constraint at risk.* | *Realization that contingencies failed – loss of control* | *Collision prevented, Loss of separation* |
| Goals | *Efficiency – min spacing and 3nm spacing* | *Efficiency – visual separation* | *Shift to safety goal* | *Efficiency - re sequence B789* |
| Plans | *Speed Control, with visual separation as contingency (x2)* | *Establish Tower visual separation or pilot visual separation* | *Too late to prevent LOS. Prevent collision, remove B789 from sequence* | *Process B789 back into sequence* |
| Actions | *Standard speed control instruction issued* | *Coordinate to tower controller and communicate with pilot of B789* | *B789 instructed to go around* | *Coordinate with flow controller and departures controller and issued instructions to B789* |
| Feedforward | *-* | *Nil sentinel event or line in the sand regarding when to switch from Efficiency to safety goal.* | *-* | *-* |
| Feedback - formative | *Closing observed and speed control instructions issued* | *High closing and safety* | *To late to prevent Loss of separation* | *Separation re-established,* |
| Feedback - summative | *-* | *-* | *-* | *-* |
| Uncertainty/Feeling of Rightness (FoR) or confidence | *Confident, typical scenario* | *Doubt, uncertainty is high* | *High uncertainty* | *Some uncertainty due loss of control* |
| Cognitive Mode Intuitive/Deliberative | *Intuitive* | *Switch from intuitive to more deliberative* | *Deliberative processing* | *Deliberative* |

**Key Element Analysis – Event Identifier (LOS B789 follows A320 on final)**

**Interactions Present Y/N Notes**

| Cues prompting reorientation or goal reappraisal | *Y* | *3.1nm and closing – visual cue from surveillance display. Goal change from efficiency with safety constraint to safety as the primary goal.* |
| --- | --- | --- |
| Emotion (uncertainty or feeling of rightness) influences the shift from intuitive to deliberative control | *Y* | *A shift from intuitive to deliberative regulation is likely in response to increasing uncertainty regarding the likelihood of infringing the safety margin. This would have been triggered after two failed attempts at implementing contingency plans (visual separation).* |
| Feedforward – action bias | *N* | *No indication that feedforward was used to set a line in the sand or create a sentinel event to trigger the transition to safety goal in a timely manner to ensure separation.* |
| Goal Conflict – Regulatory breakdown | *Y* | *The shift to safety from efficiency eventually occurred, but it was untimely and did not prevent loss of separation. Too much reliance on typicality and intuitive regulation, with a late shift to more deliberative regulation.* |
